# Supplementary material for: The Effect of Walnut Intake on Lipids: A Systematic Review and Meta-Analysis of Randomized Controlled Trials
Source: MDPI journal article supplement (doi:10.3390/nu14214460), 2022-10-23
Supplement: s1 [file s1]

# Supplementary Materials: The Effect of Walnut Intake on Lipids: Systematic Review and Meta-Analysis of Randomized Controlled Trials

Saeed Mastour Alshahrani, Reham M Mashat, Diao Almutairi, Alaa Mathkour, Sahar Saad Alqahtani, Amirah Alasmari, Abdullah Hassan Alzahrani, Reem Ayed, Mohammed Yahya Asiri, Alsanussi Elsherif and Abdullah Alsabaani

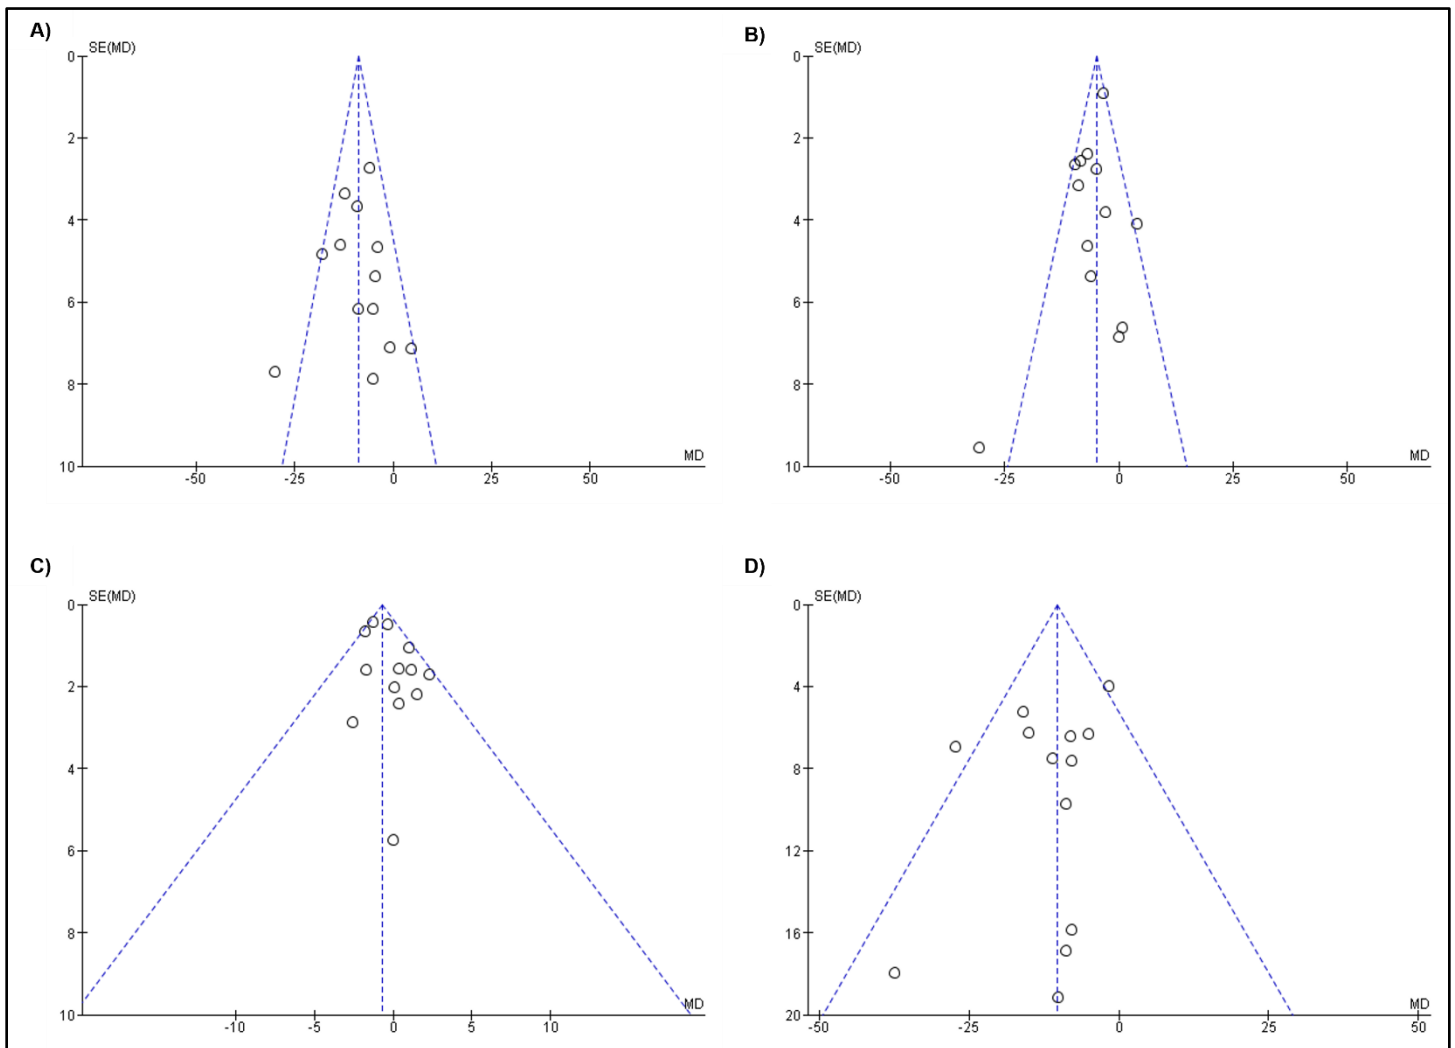

**Figure S1.** Funnel plots representing publication bias in the studies reporting the effect of walnut consumption on (A) TC (mg/dL), (B) LDL-C (mg/dL), (C) HDL-C (mg/dL) and (D) TG (mg/dL).
